# Supplementary material
Source: Springer Nature journal article supplement (https://www.springermedizin.de/resource/supplementary/12985_2010_840_MOESM2_ESM.pdf/9609314)

A.

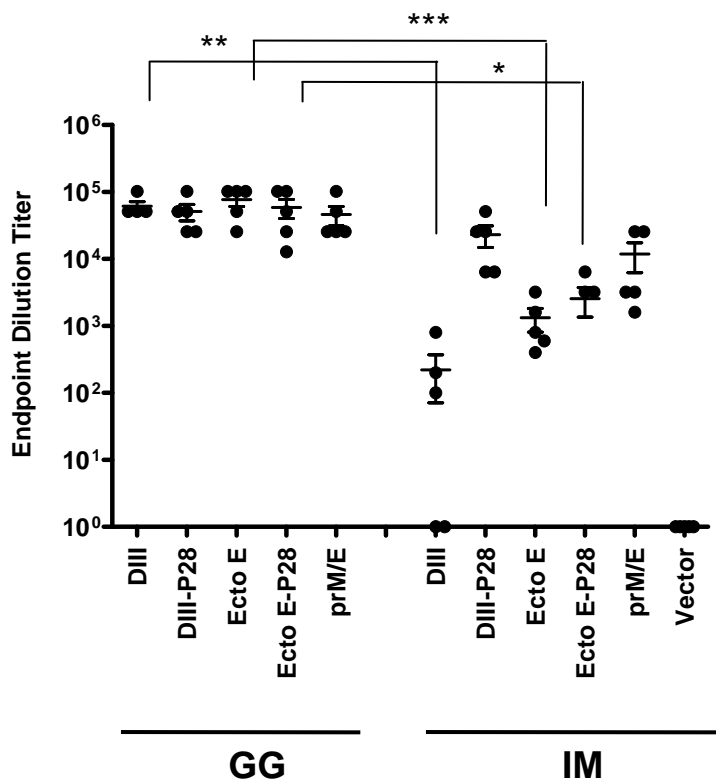

B.

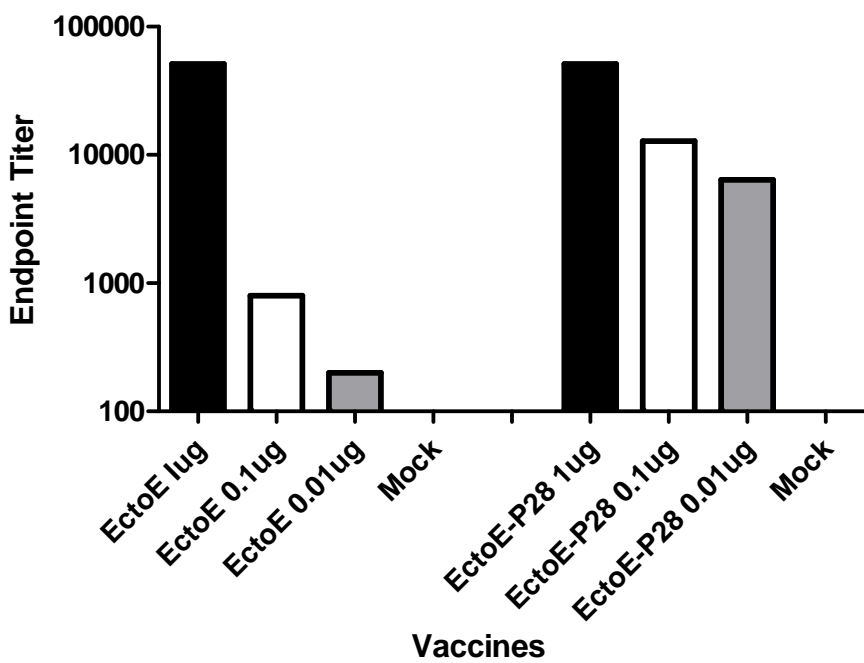

Supplement: MOESM2 [file 9609314]
